# Supplementary material
Source: PubMed Central journal article supplement (PMC3440776)

## Supplementary Data

### Supplementary Materials and Methods

#### *siRNA Transfection*

Cells were plated in 6 well plates for 24 h, transfected with 20 nM siRNA using HiPerFect (Qiagen, Basel, Switzerland), and cell lysates were prepared 72 h later. The following siRNA target sequences were used: raptor #3 (used for all other experiments in this manuscript) = 5'-*TAT TTG GTC GTC CAA TCT CGT*-3'; raptor #4 = 5'-*TTC TCC ACC GAG TAC ACG GAG*-3'; raptor #6 = 5'-*ATA AAG AGT GCG GAG ACC CTT*-3'. rictor #9 (used for all other experiments in this manuscript) = 5'-*TTA ATT GTA GCA ATA GAG GGT*-3'; rictor #8 = 5'-*TTC ACA GTA ATC ATC TTT CTG*-3'; rictor SmartPool siRNA was purchased from Dharmacon (Lafayette, CO, USA). Luciferase = 5'-*AAC GTA CGC GGA ATA CTT CGA*-3'. IRS1 SmartPool siRNA was purchased from Dharmacon (Lafayette, CO, USA).

### Supplementary Legends

#### **Supplementary Figure 1. 20 nM RAD001 efficiently inhibits the mTORC1 pathway.**

Human cancer cell lines were treated for the indicated times with vehicle control (DMSO) or 20 nM RAD001. Cell lines are listed according to ascending IC<sub>50</sub> values for RAD001 (Table 1). Total protein lysate was prepared and subjected to western blot analysis. RAD001-induced effects are shown for S6 S235/236 phosphorylation.

**Supplementary Figure 2. Effect of RAD001 and IRS1 siRNA treatment on IRS1 protein levels and AKT S473/T308 phosphorylation.** Human cancer cell lines were treated for the indicated times with vehicle control (DMSO) or 20 nM RAD001 (**A**). Cell lines are listed according to ascending IC<sub>50</sub> values for RAD001 (anti-proliferative IC<sub>50</sub>: listed in Table 1). Total protein lysates were subjected to immunoblot analysis. RAD001-induced effects are shown for IRS1 protein expression level. (**B**) Cells were transfected with IRS1 siRNA (20 nM) for 72 h and treated with RAD001 (20 nM) or DMSO for the last 24 h. Effects of IRS1 down-regulation on RAD001-induced AKT S473 and T308 phosphorylation are shown for HCT116, SKBR3, and A549 cells.

**Supplementary Figure 3. siRNA analysis of the role of raptor and rictor in the regulation of basal AKT phosphorylation.** Tumor cells were treated with RAD001 (20 nM) for 48 h or transfected with siRNA (20 nM) for 72 h prior to protein extraction and immunoblot analysis. Increased AKT phosphorylation after RAD001 treatment (**A**) is recapitulated by down-regulation of raptor protein expression (**B**) in cell lines representing a wide range of IC<sub>50</sub> values for RAD001 (see Table 1). Down-regulation of rictor (**C**) slightly reduces AKT S473 phosphorylation with variable effects on AKT T308 phosphorylation.

**Supplementary Figure 4. Specificity of raptor and rictor siRNA-mediated response on AKT S473 phosphorylation.** A549 cells were transfected with 20 nM control luciferase siRNA or siRNA against raptor (#3, #4, #6) or rictor (#9, #8, Dharmacon rictor siRNA) prior to treatment with vehicle control (DMSO) or 20 nM RAD001 for 24 h.

Efficient down-regulation of rictor and raptor protein expression was observed with all siRNA sequences. Effects of raptor siRNA on basal AKT S473 and RAD001-induced AKT S473 phosphorylation was confirmed using three different siRNA sequences. Attenuation of RAD001-induced AKT S473 phosphorylation was achieved using three different rictor siRNA sequences. De-phosphorylation of S6 on S235/236 is shown as a control for RAD001-induced inhibition of mTORC1 signaling. AKT protein levels serve as loading controls.

# Supplementary Figure 1

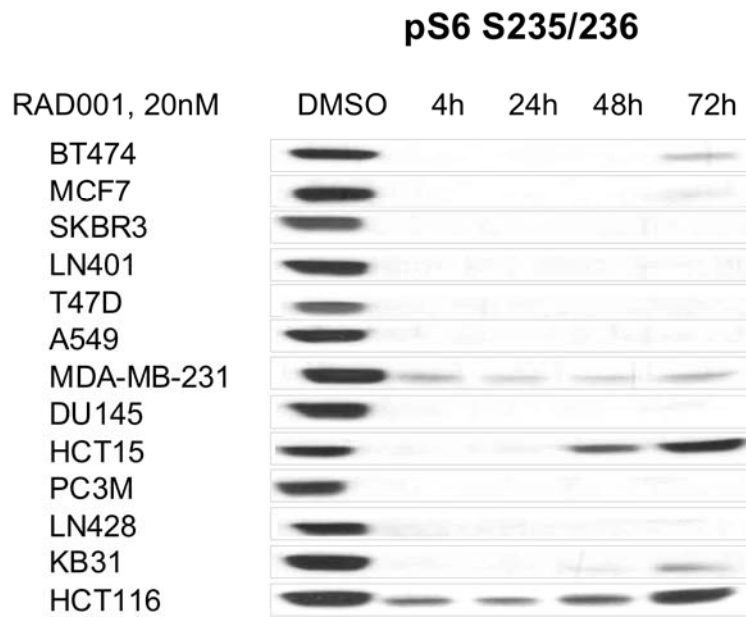

# Supplementary Figure 2

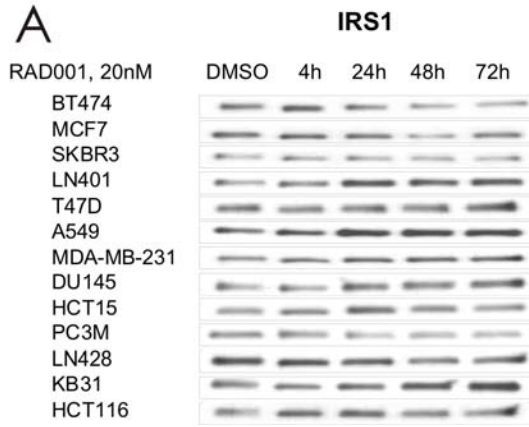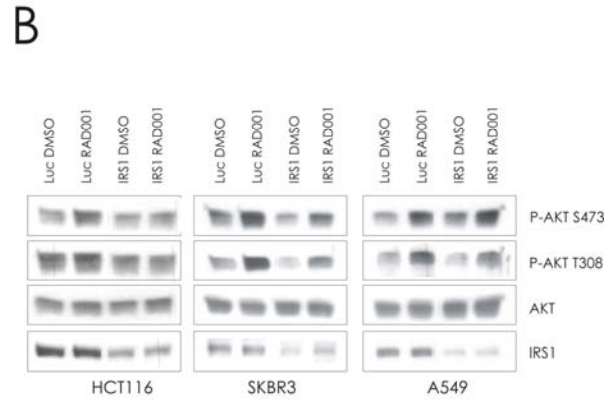

# Supplementary Figure 3

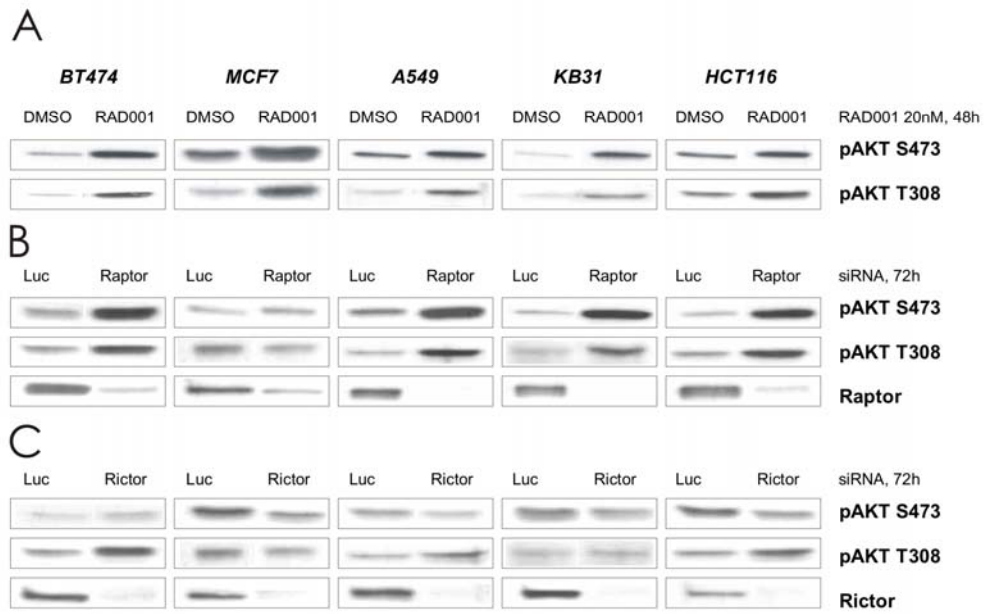

# Supplementary Figure 4

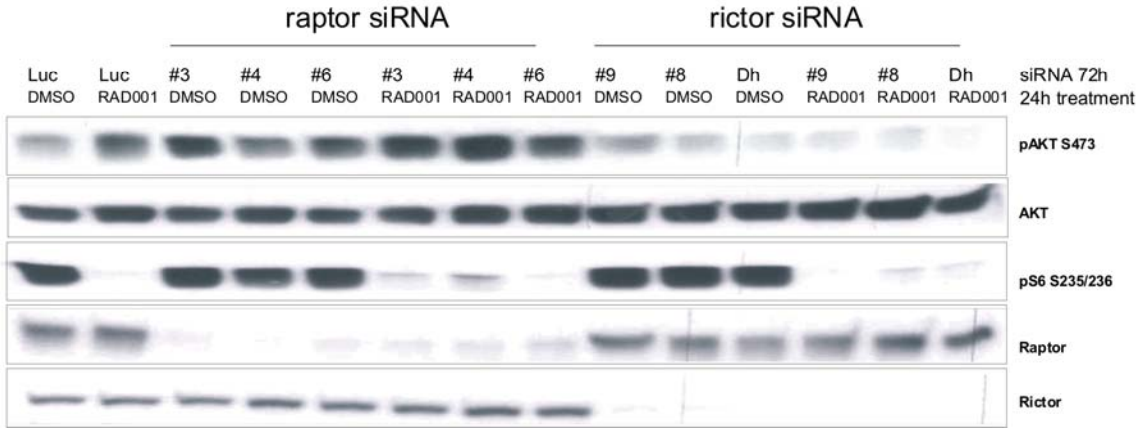

Supplement: NIHMS404620-supplement-supplemental_data.pdf [file NIHMS404620-supplement-supplemental_data.pdf]
